# Supplementary material for: A potent multifunctional ZIF-8 nanoplatform developed for colorectal cancer therapy by triple-delivery of chemo/radio/targeted therapy agents
Source: Royal Society of Chemistry journal article supplement (doi:10.1039/d3tb02571c), 2024-01-01
Supplement: d3tb02571c1.pdf [file d3tb02571c1.pdf]

**A potent multifunctional ZIF-8 nanoplatform developed for colorectal cancer by triple-delivery of chemo/radio/targeted therapy agents**

Sonia Iranpour<sup>a</sup>, Ahmad Reza Bahrami<sup>a,b</sup>, Mahdieh Dayyani<sup>c</sup>, Amir Sh. Saljooghi<sup>d\*</sup>, Maryam M. Matin<sup>a,e\*</sup>

<sup>a</sup> Department of Biology, Faculty of Science, Ferdowsi University of Mashhad, Mashhad, Iran

<sup>b</sup> Industrial Biotechnology Research Group, Institute of Biotechnology, Ferdowsi University of Mashhad, Mashhad, Iran

<sup>c</sup> Radiation Oncology Department, Reza Radiotherapy and Oncology Center, Mashhad, Iran

<sup>d</sup> Department of Chemistry, Faculty of Science, Ferdowsi University of Mashhad, Mashhad, Iran

<sup>e</sup> Novel Diagnostics and Therapeutics Research Group, Institute of Biotechnology, Ferdowsi University of Mashhad, Mashhad, Iran

\* Correspondence: saljooghi@um.ac.ir; matin@um.ac.ir (ORCID: 0000-0002-7949-7712)



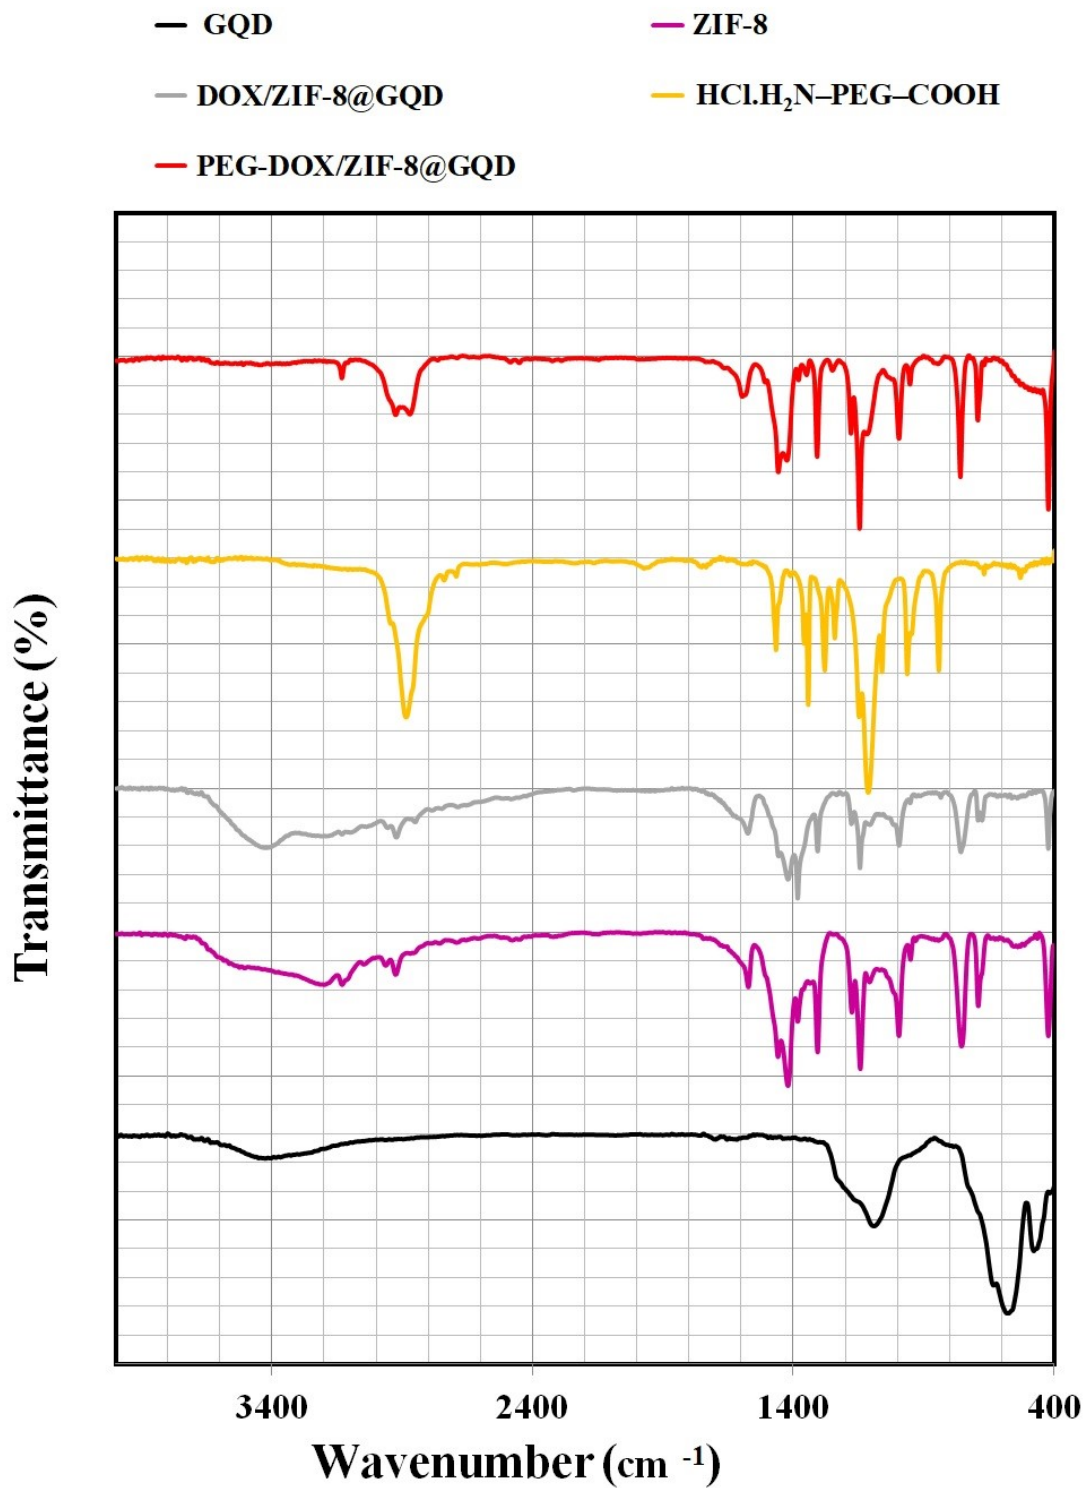

**Fig. S1:** Fourier transform infrared (FTIR) spectra of nano-delivery platforms in each step of the catalyst fabrication.

**Abbreviations:** ZIF-8; Zeolitic imidazolate framework-8, GQD; Graphene quantum dot, DOX; Doxorubicin and PEG, Polyethylene glycol

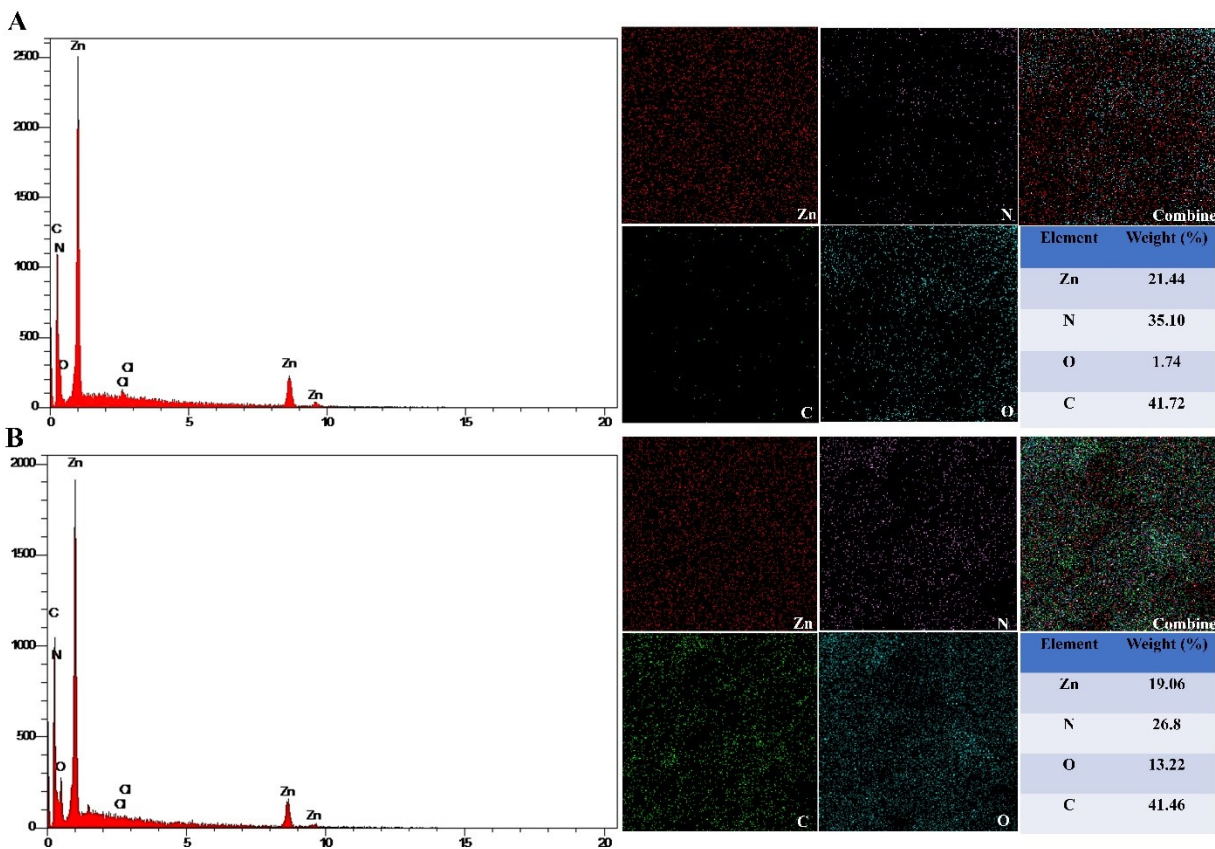

**Fig. S2:** EDX analysis of (A) DOX/ZIF-8@GQD and (B) PEG-DOX/ZIF-8@GQD.

**Abbreviations:** EDX; Energy dispersive X-Ray analysis, DOX; Doxorubicin, ZIF-8; Zeolitic imidazolate framework-8, GQD; Graphene quantum dot and PEG; Polyethylene glycol.
